# Supplementary material
Source: publisher site journal article supplement (https://spandidos-publications.com/6051/downloadSupplementary)

Figure S1. Flowchart for the literature search and selection.

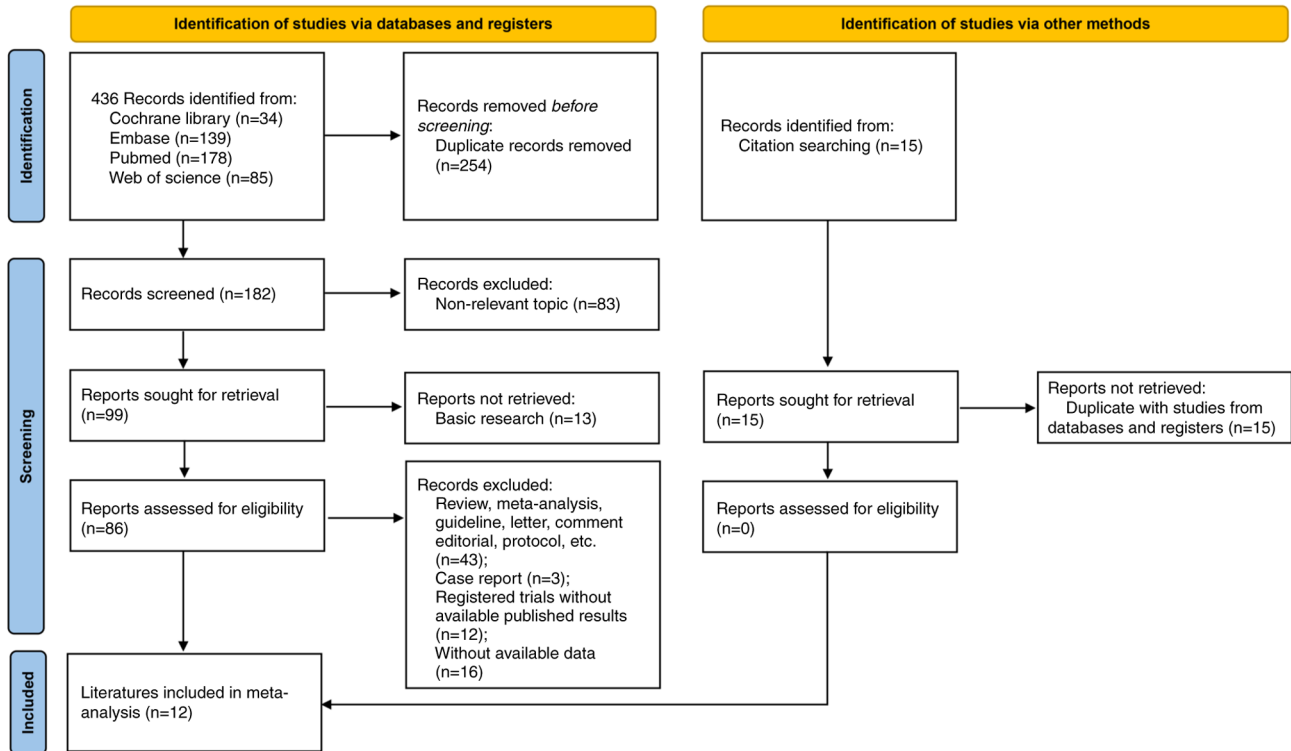

Figure S2. Forest plot showing the comparison of allele C vs. allele T for all studies. The squares and horizontal lines correspond to the study-specific OR and 95% CI. The area of the squares reflects the weight (inverse of the variance). The diamond represents the summary OR and 95% CI. OR, odds ratio; df, degrees of freedom; CVE, cardio-cerebrovascular events.

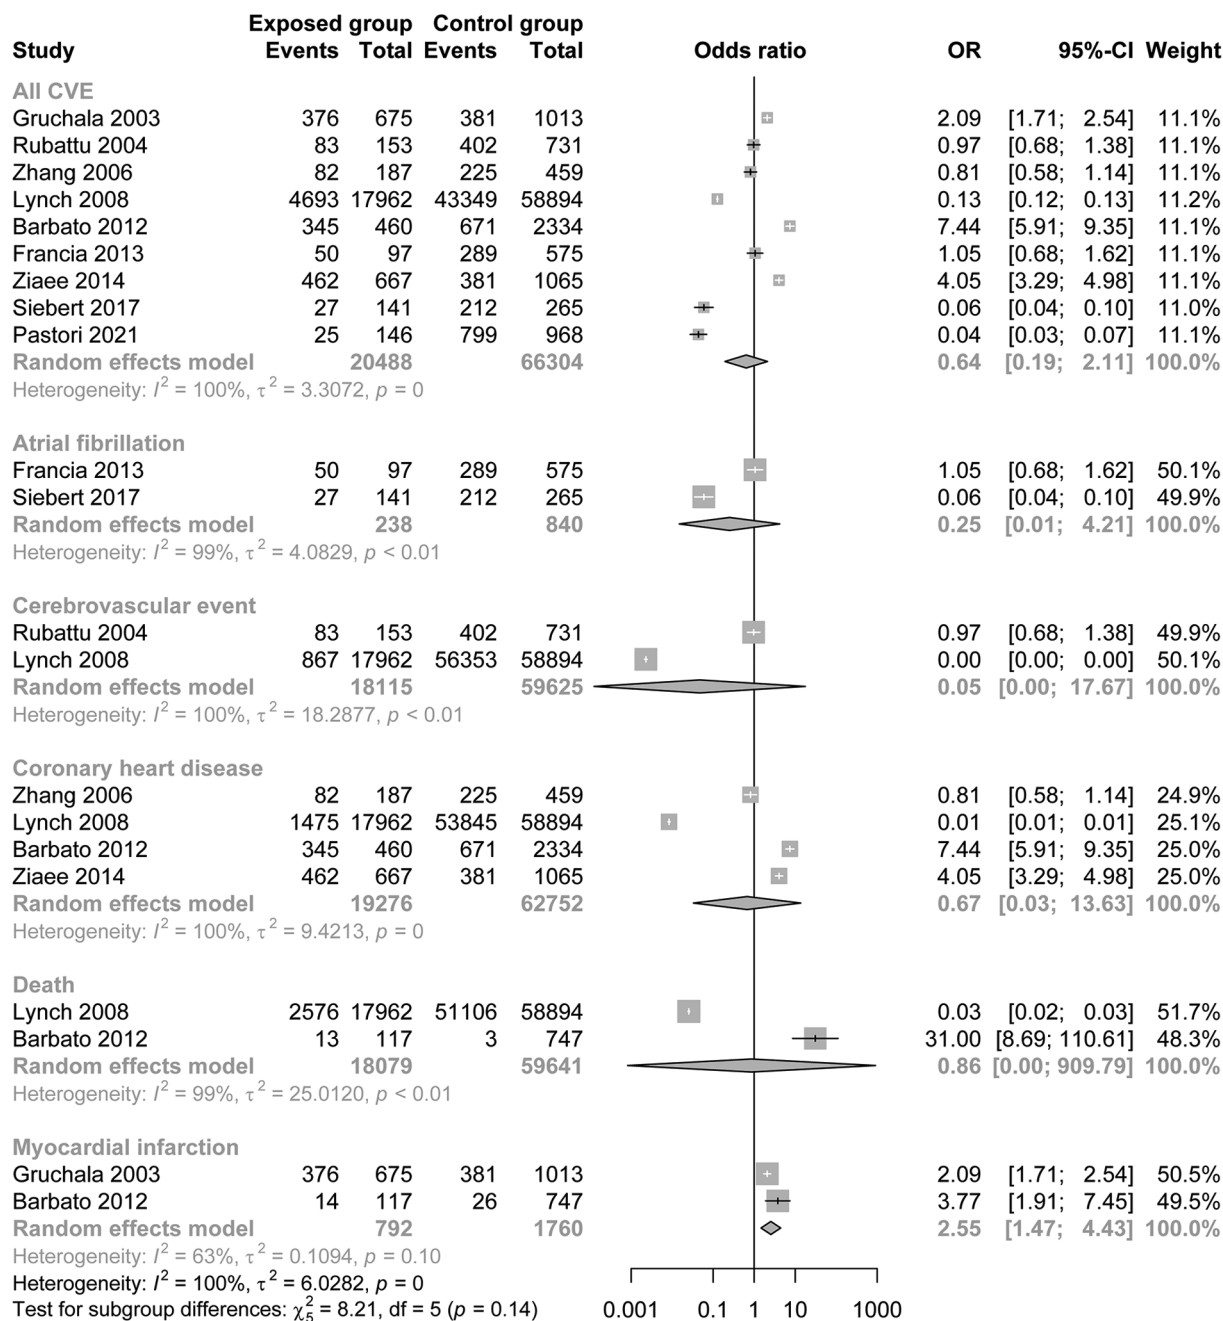

Figure S3. Forest plot showing the comparison of CC vs. TT for all studies. The squares and horizontal lines correspond to the study-specific OR and 95% CI. The area of the squares reflects the weight (inverse of the variance). The diamond represents the summary OR and 95% CI. OR, odds ratio; df, degrees of freedom; CVE, cardio-cerebrovascular events.

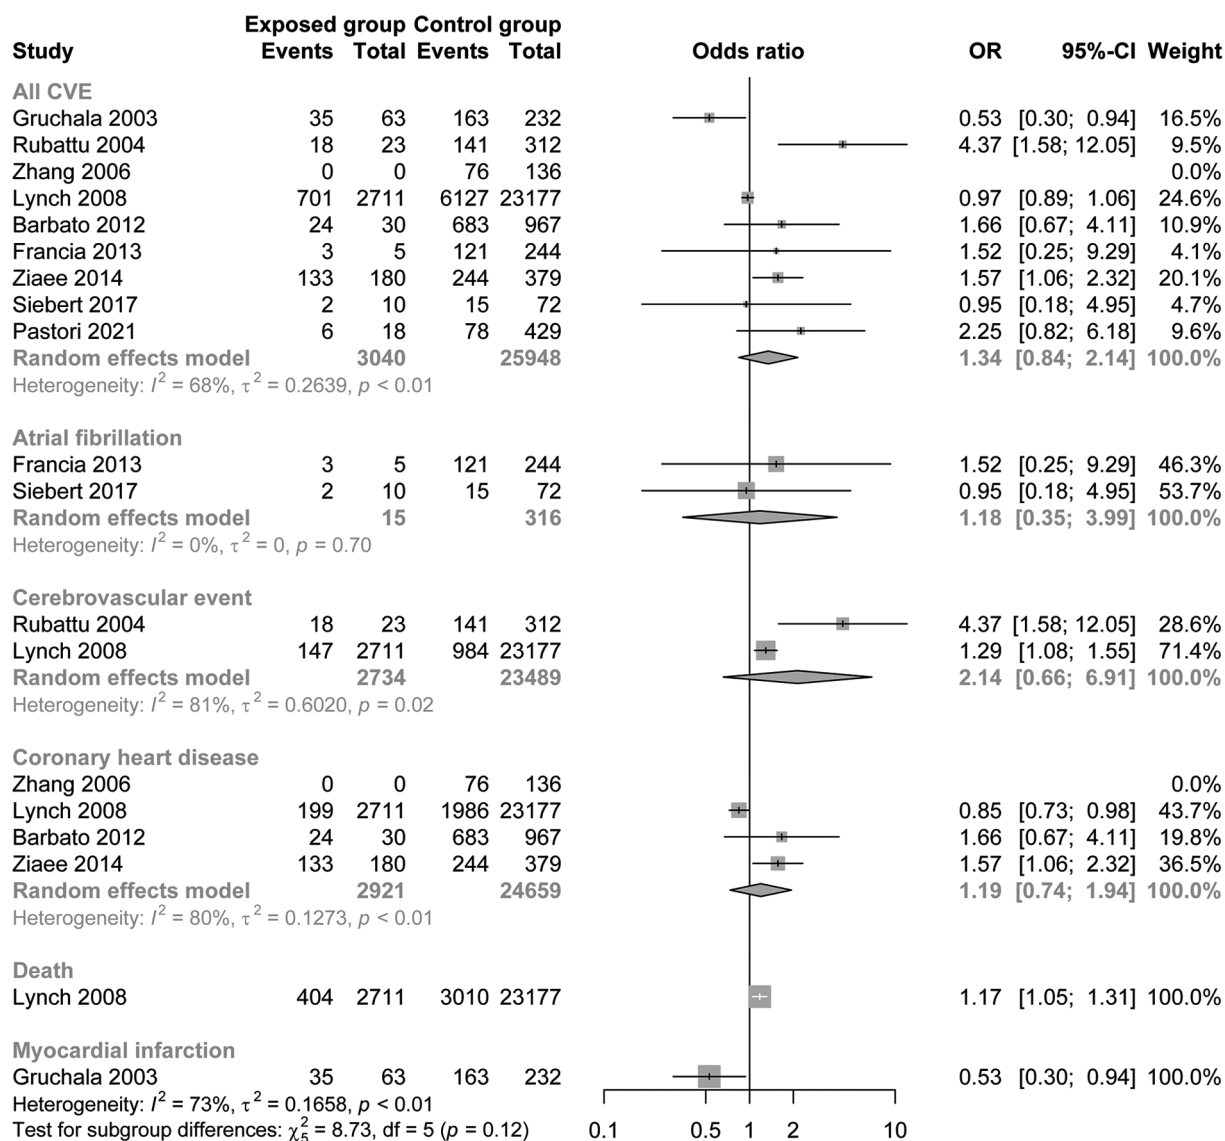

Figure S4. Forest plot showing the comparison of CT vs. TT for all studies. The squares and horizontal lines correspond to the study-specific OR and 95% CI. The area of the squares reflects the weight (inverse of the variance). The diamond represents the summary OR and 95% CI. OR, odds ratio; df, degrees of freedom; CVE, cardio-cerebrovascular events.

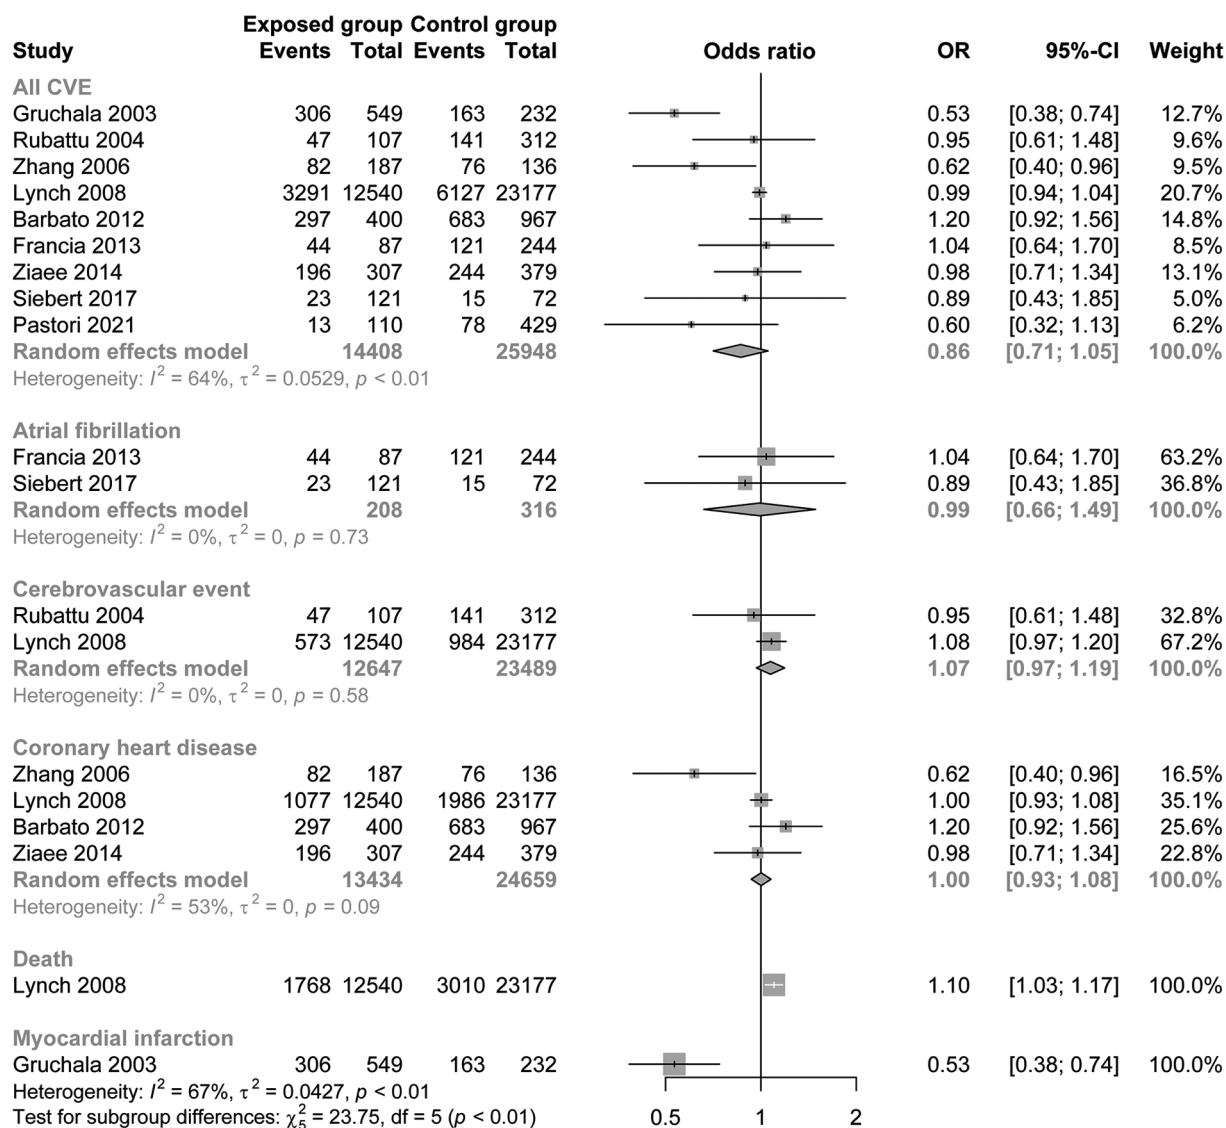

Figure S5. Forest plot showing the comparison of (CC + CT) vs. TT for all studies. The squares and horizontal lines correspond to the study-specific OR and 95% CI. The area of the squares reflects the weight (inverse of the variance). The diamond represents the summary OR and 95% CI. OR, odds ratio; df, degrees of freedom; CVE, cardio-cerebrovascular events.

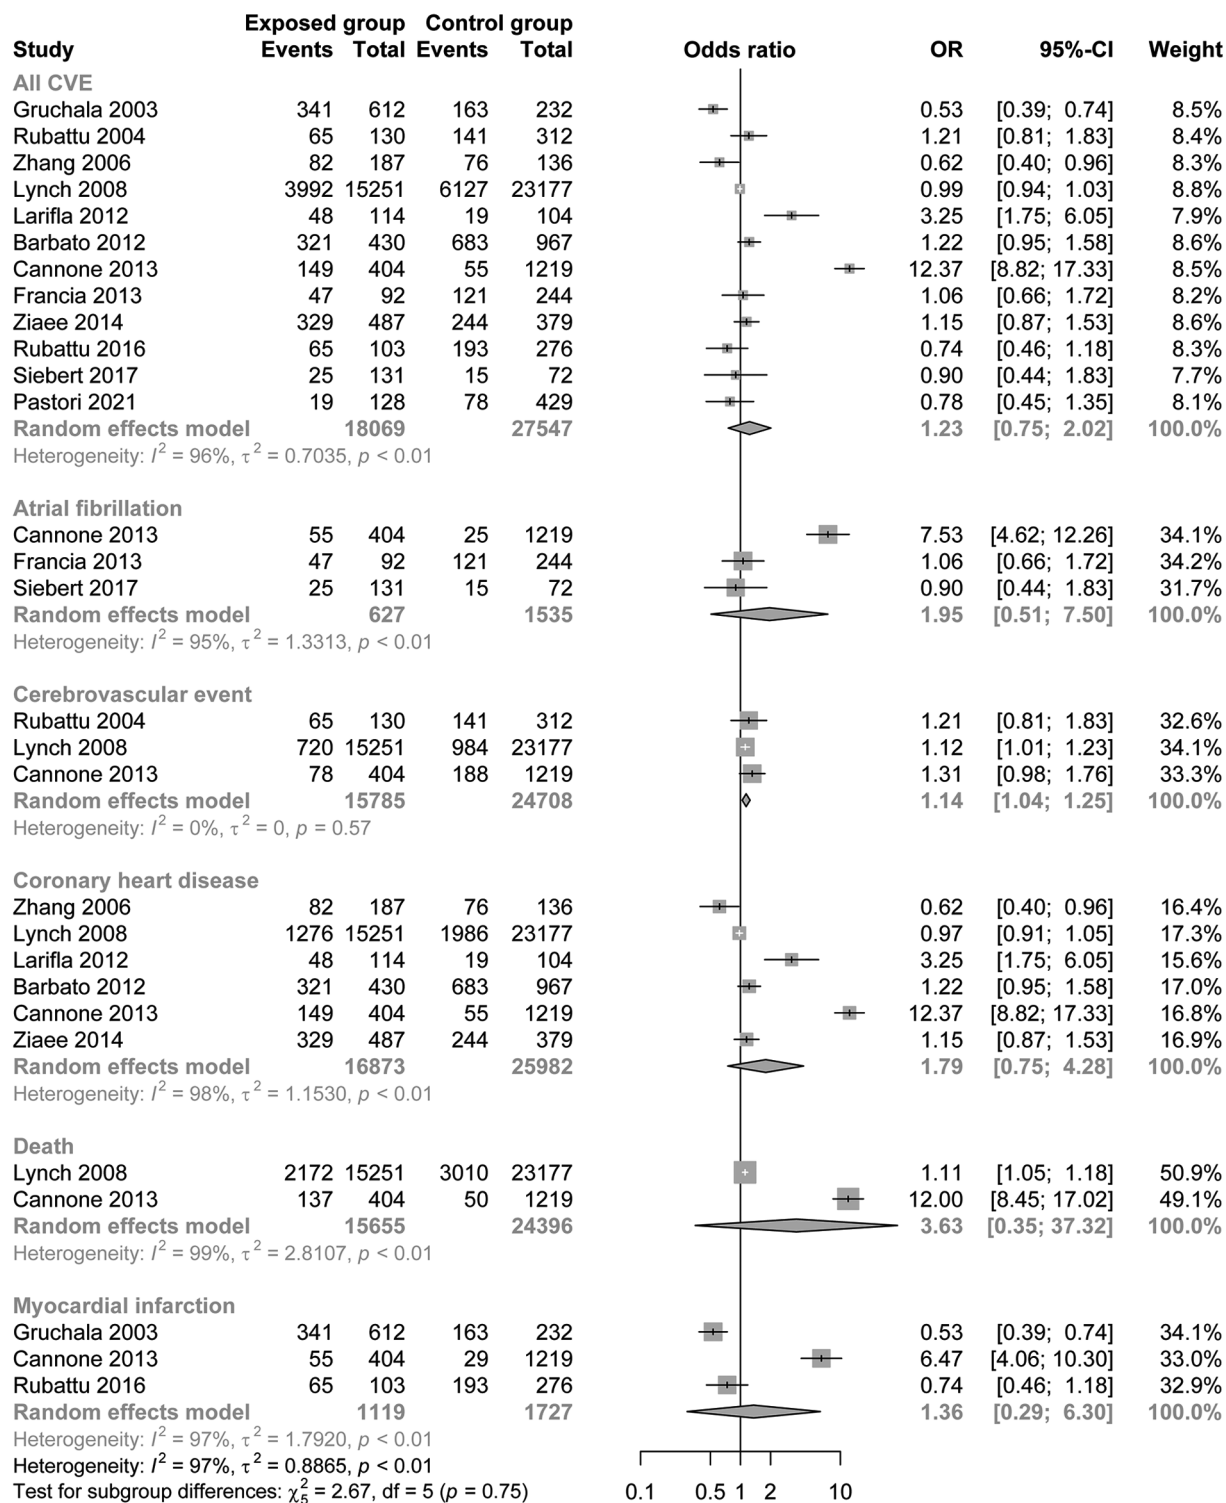

Figure S6. Forest plot showing the comparison of CC vs. (CT + TT) for all studies. The squares and horizontal lines correspond to the study-specific OR and 95% CI. The area of the squares reflects the weight (inverse of the variance). The diamond represents the summary OR and 95% CI. OR, odds ratio; df, degrees of freedom; CVE, cardio-cerebrovascular events.

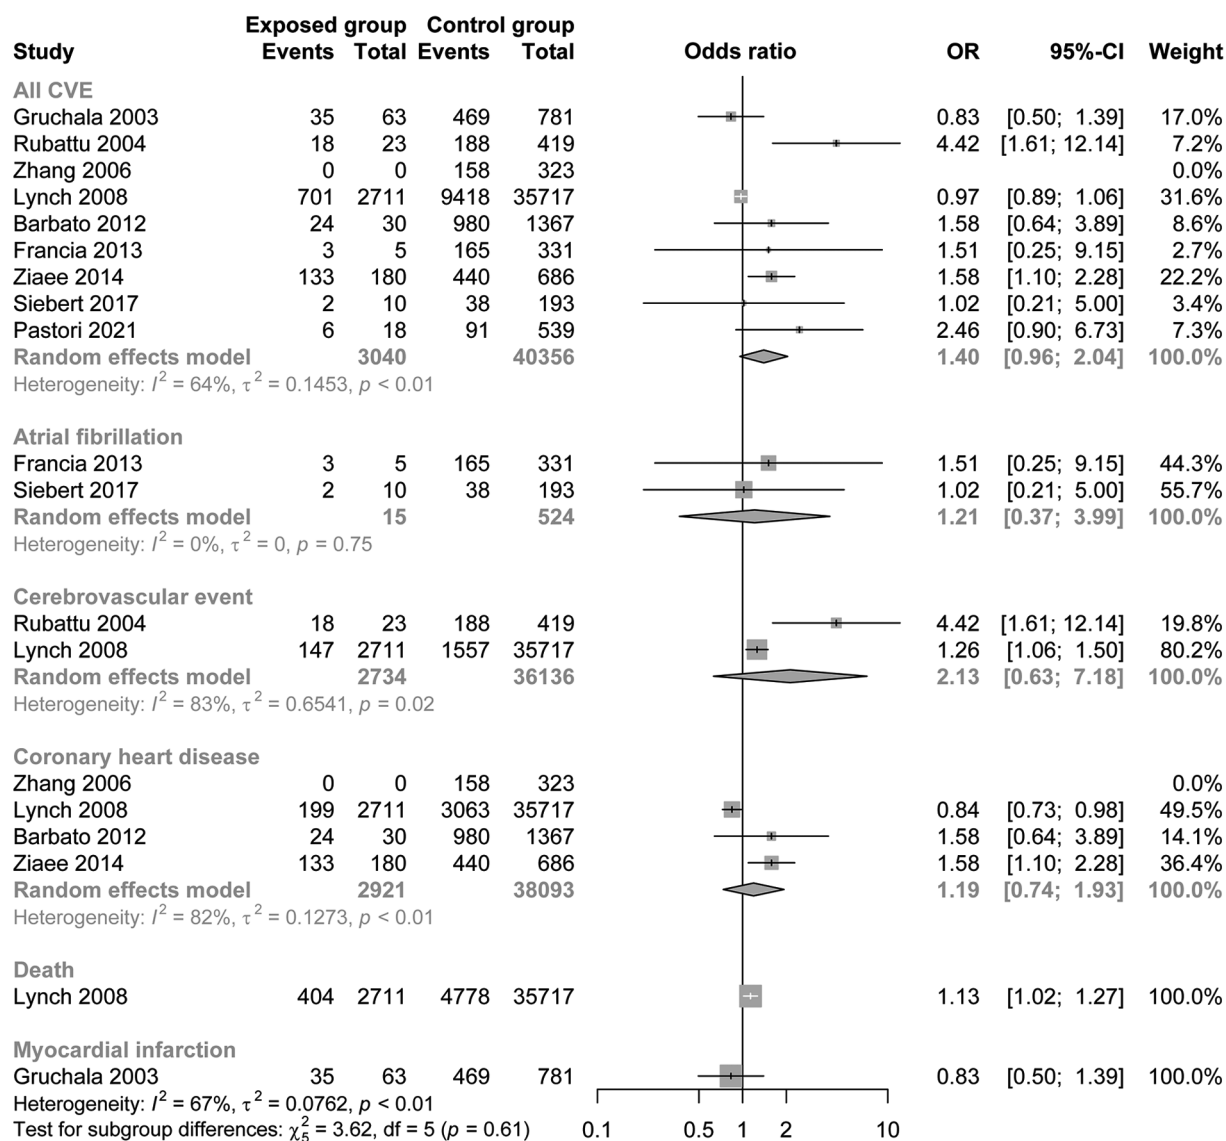

Figure S7. Forest plot showing the comparison of CT vs. (TT + CC) for all studies. The squares and horizontal lines correspond to the study-specific OR and 95% CI. The area of the squares reflects the weight (inverse of the variance). The diamond represents the summary OR and 95% CI. OR, odds ratio; df, degrees of freedom; CVE, cardio-cerebrovascular events.

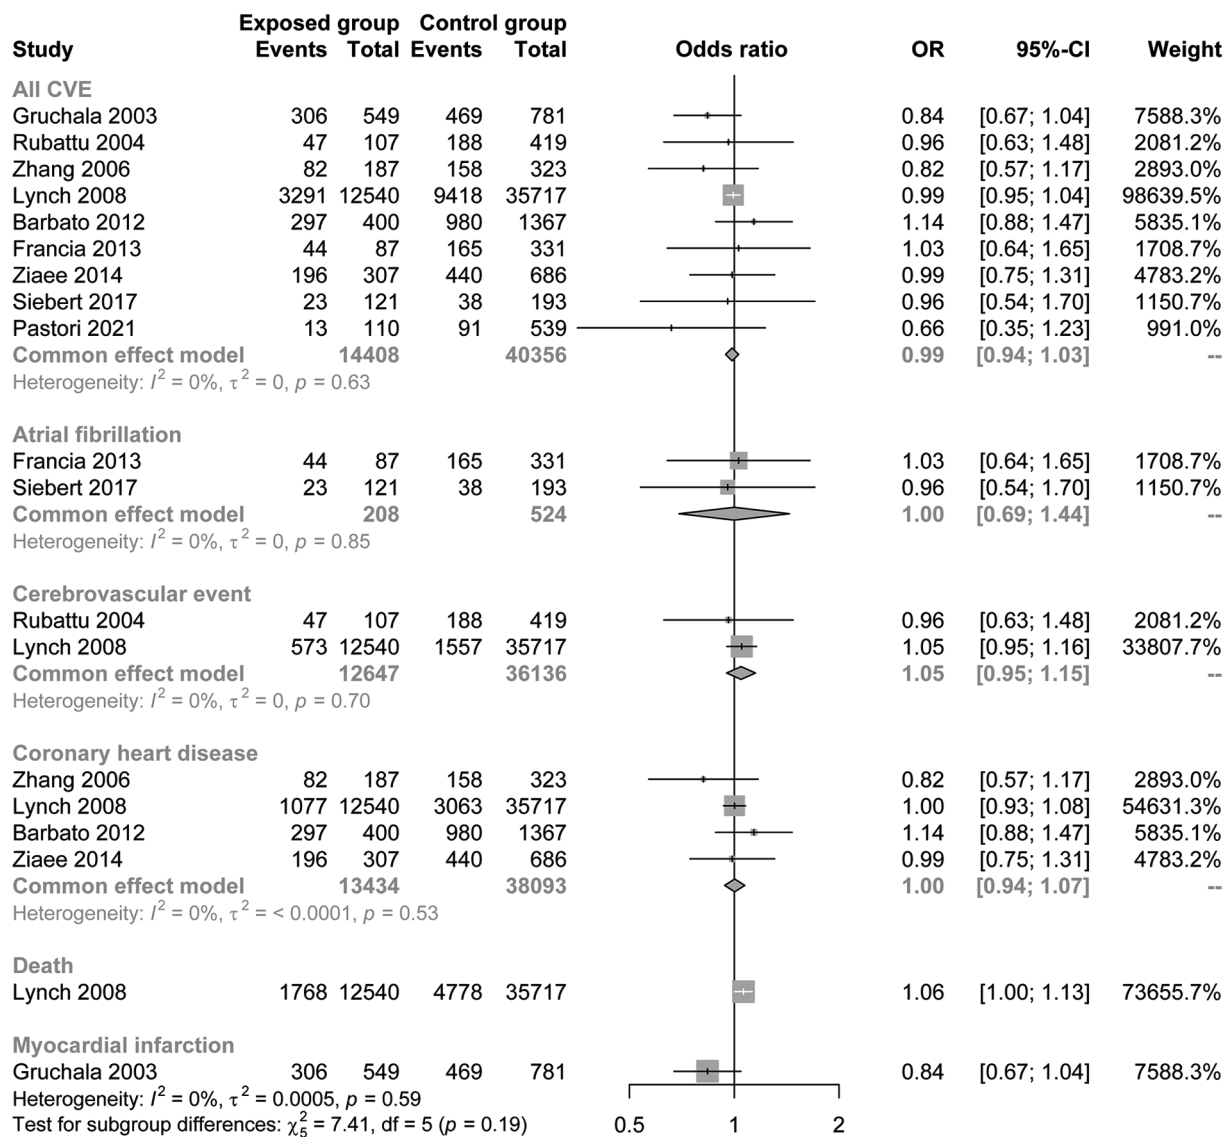



Figure S8. Forest plot showing the comparison of C vs. T for studies with Hardy-Weinberg equilibrium. The squares and horizontal lines correspond to the study-specific OR and 95% CI. The area of the squares reflects the weight (inverse of the variance). The diamond represents the summary OR and 95% CI. OR, odds ratio; df, degrees of freedom; CVE, cardio-cerebrovascular events.

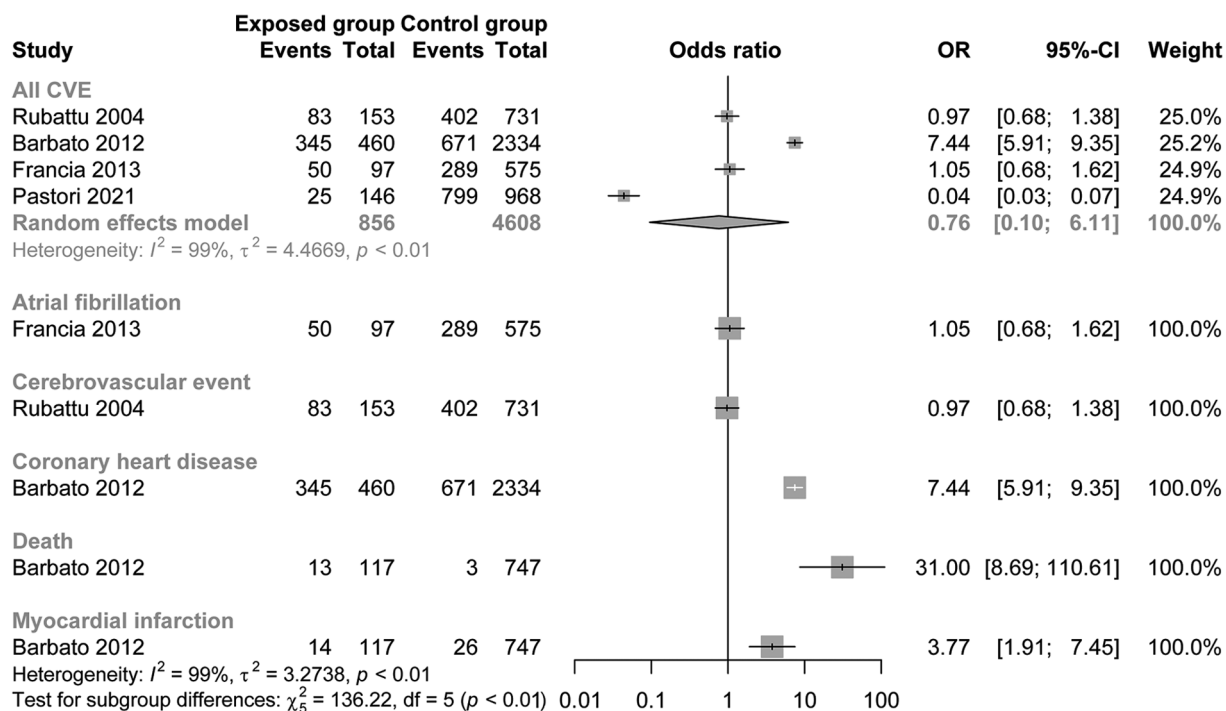



Figure S9. Forest plot showing the comparison of CC vs. TT for studies with Hardy-Weinberg equilibrium. The squares and horizontal lines correspond to the study-specific OR and 95% CI. The area of the squares reflects the weight (inverse of the variance). The diamond represents the summary OR and 95% CI. OR, odds ratio; df, degrees of freedom; CVE, cardio-cerebrovascular events.

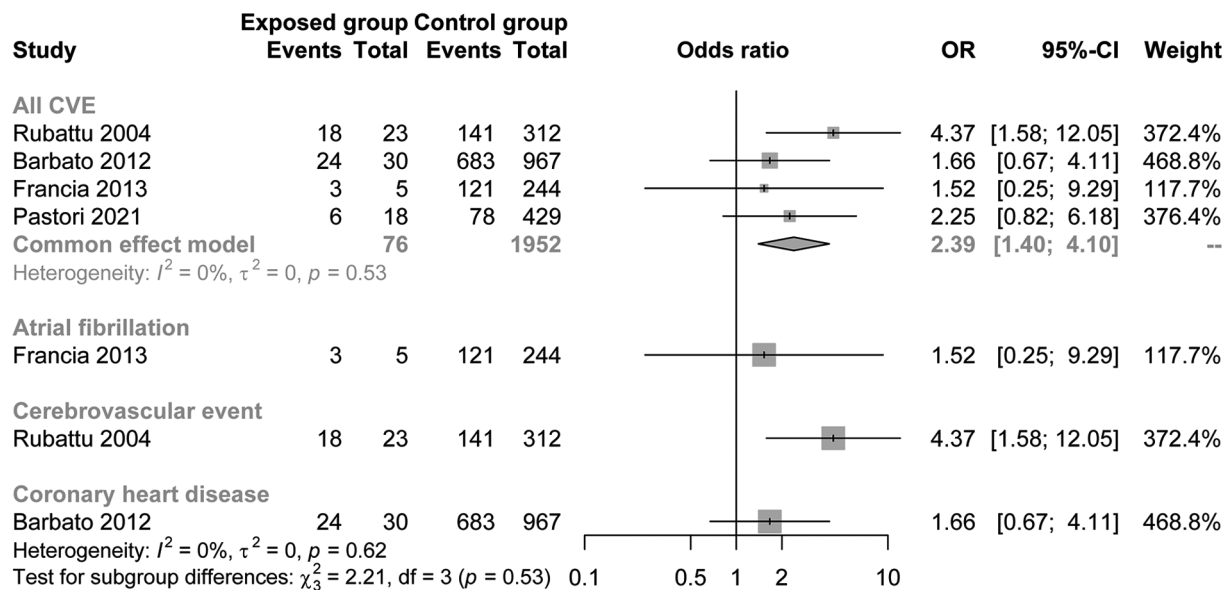

Figure S10. Forest plot showing the comparison of CT vs. TT for studies with Hardy-Weinberg equilibrium. The squares and horizontal lines correspond to the study-specific OR and 95% CI. The area of the squares reflects the weight (inverse of the variance). The diamond represents the summary OR and 95% CI. OR, odds ratio; df, degrees of freedom; CVE, cardio-cerebrovascular events.

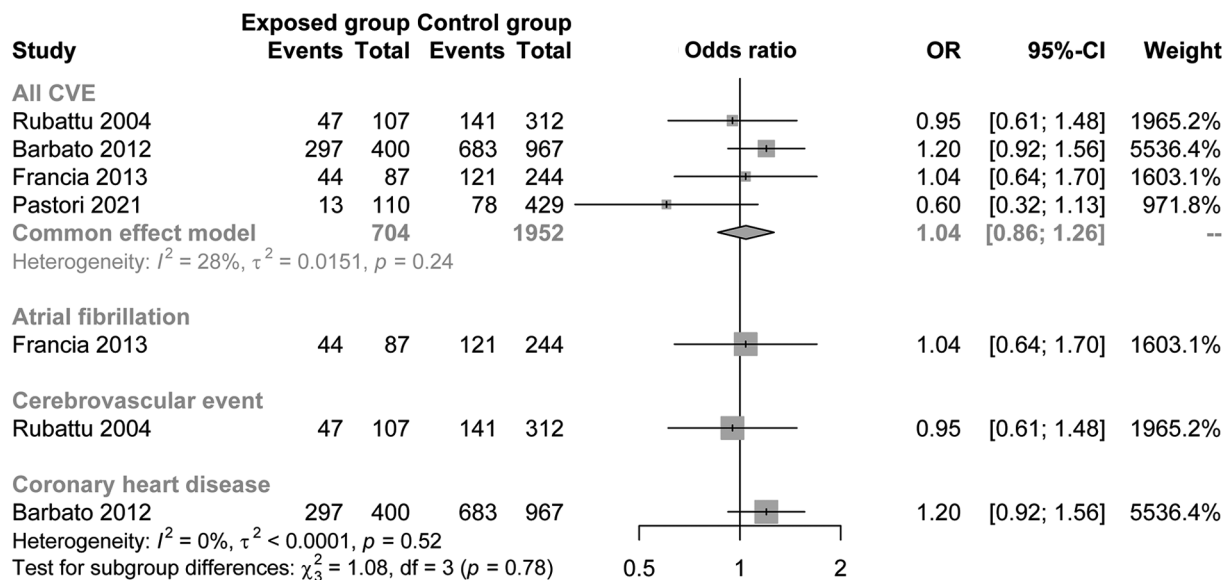

Figure S11. Forest plot showing the comparison of (CC + CT) vs. TT for studies with Hardy-Weinberg equilibrium. The squares and horizontal lines correspond to the study-specific OR and 95% CI. The area of the squares reflects the weight (inverse of the variance). The diamond represents the summary OR and 95% CI. OR, odds ratio; df, degrees of freedom; CVE, cardio-cerebrovascular events.

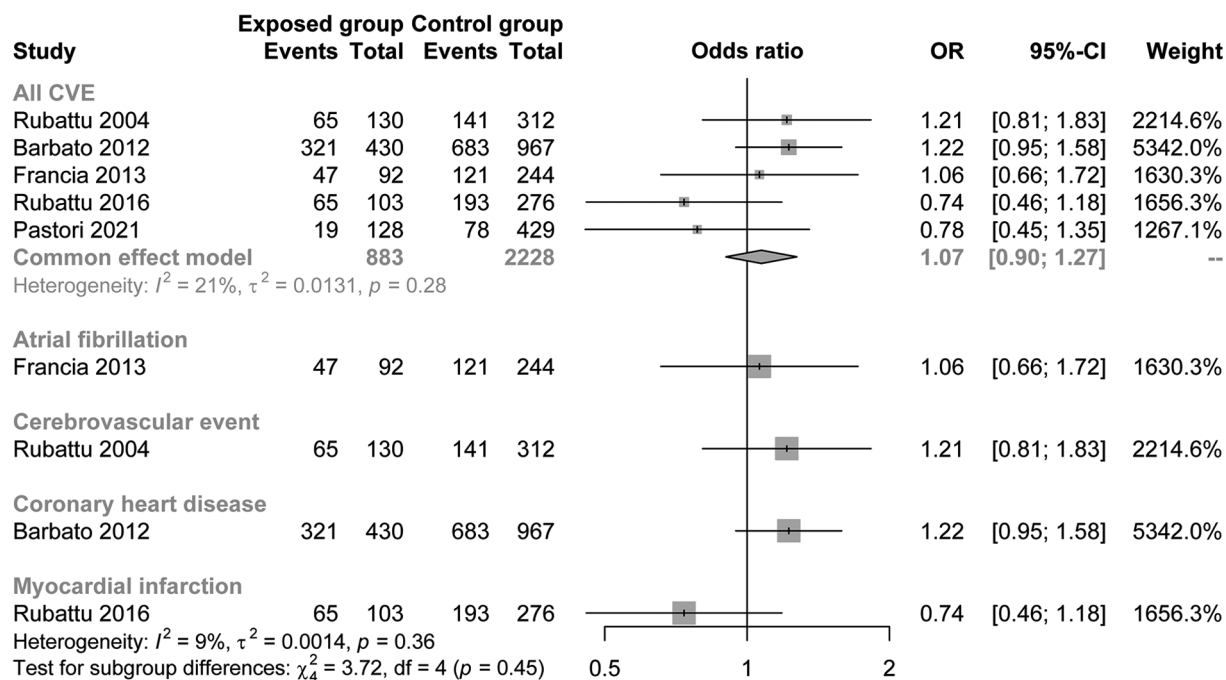

Figure S12. Forest plot showing the comparison of CC vs. (CT + TT) for studies with Hardy-Weinberg equilibrium. The squares and horizontal lines correspond to the study-specific OR and 95% CI. The area of the squares reflects the weight (inverse of the variance). The diamond represents the summary OR and 95% CI. OR, odds ratio; df, degrees of freedom; CVE, cardio-cerebrovascular events.

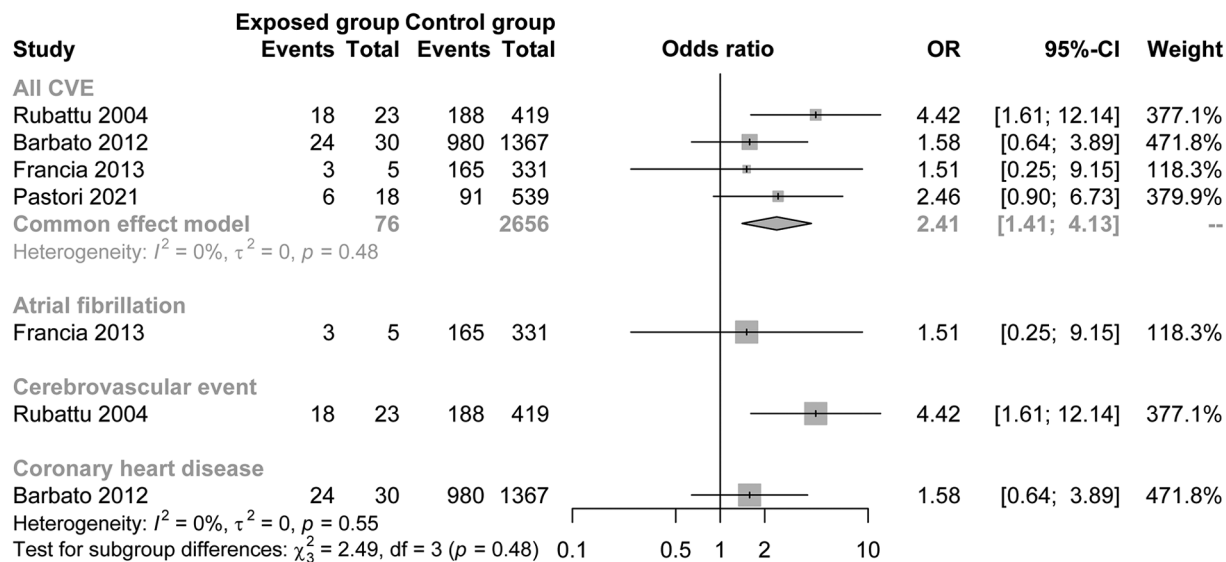

Figure S13. Forest plot showing the comparison of CT vs. (CT + TT) for studies with Hardy-Weinberg equilibrium. The squares and horizontal lines correspond to the study-specific OR and 95% CI. The area of the squares reflects the weight (inverse of the variance). The diamond represents the summary OR and 95% CI. OR, odds ratio; df, degrees of freedom; CVE, cardio-cerebrovascular events.

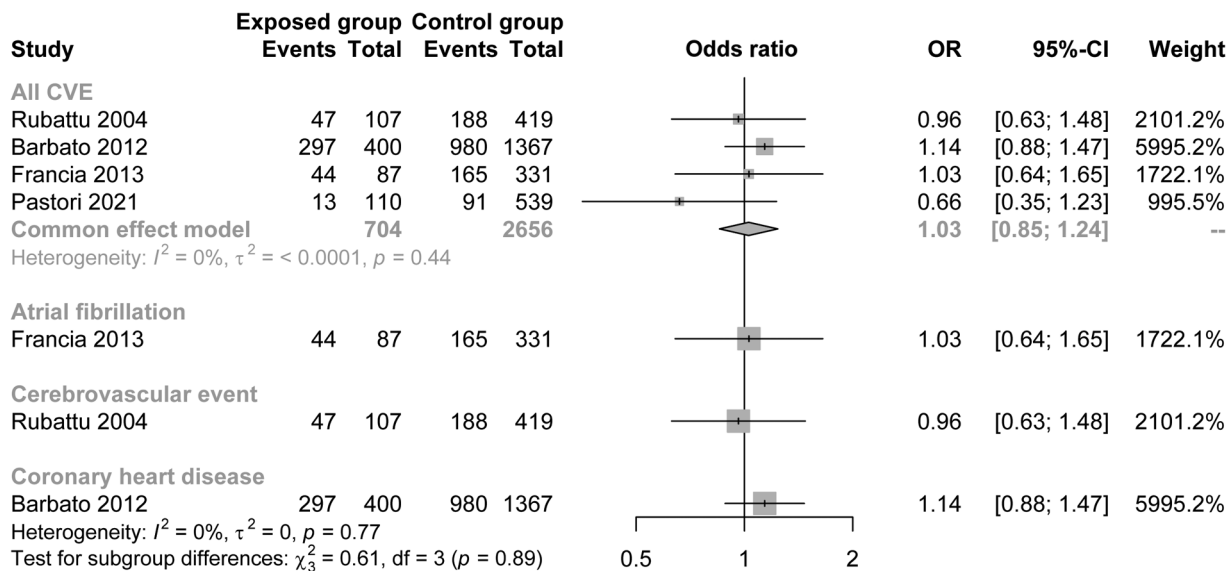

Figure S14. Egger's publication bias plot and P-value for the comparison of (CC + CT) vs. TT. Each data-point represents a separate study for the indicated association.

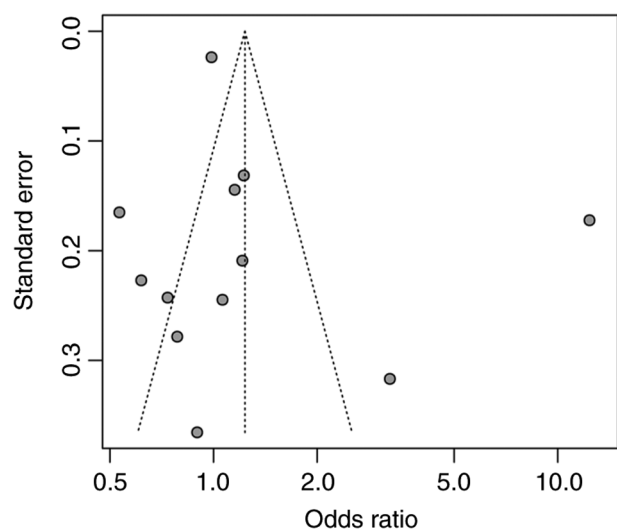

Figure S15. Sensitivity analysis for testing the stability of the overall estimate in the recessive model for studies. OR, odds ratio.

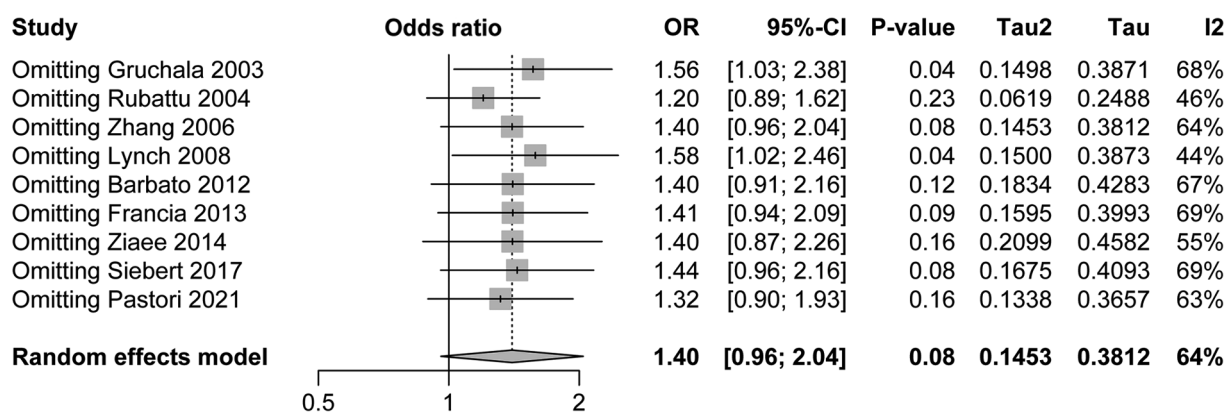



Figure S16. Sensitivity analysis for testing the stability of the overall estimate in the homozygote model for studies with Hardy-Weinberg equilibrium. OR, odds ratio.

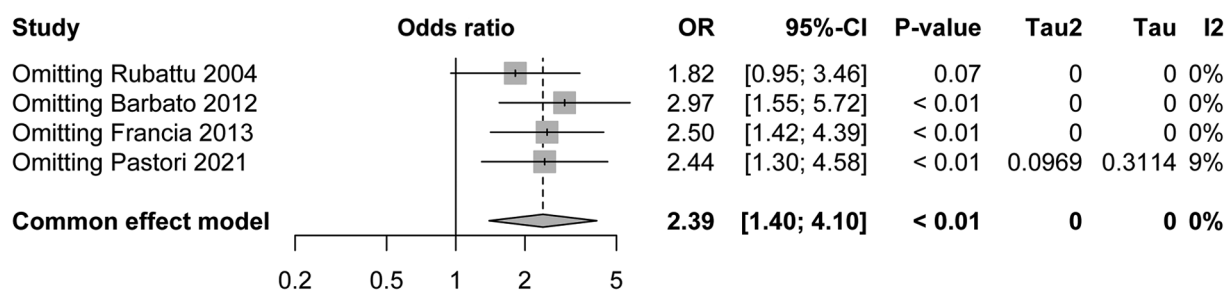

Figure S17. Sensitivity analysis for testing the stability of the overall estimate in the recessive model for studies with Hardy-Weinberg equilibrium. OR, odds ratio.

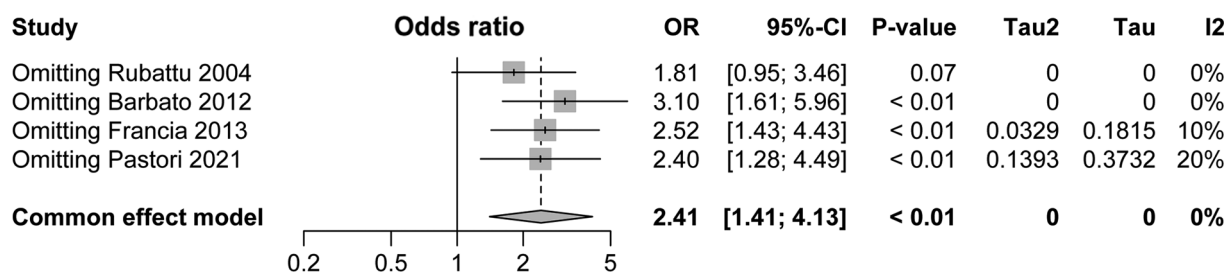

Figure S18. Forest plot for the subgroup analysis for NOS score in the recessive model regarding composite cardio-cerebrovascular event outcome. The squares and horizontal lines correspond to the study-specific OR and 95% CI. The area of the squares reflects the weight (inverse of the variance). The diamond represents the summary OR and 95% CI. OR, odds ratio; df, degrees of freedom; NOS, Newcastle-Ottawa scale.

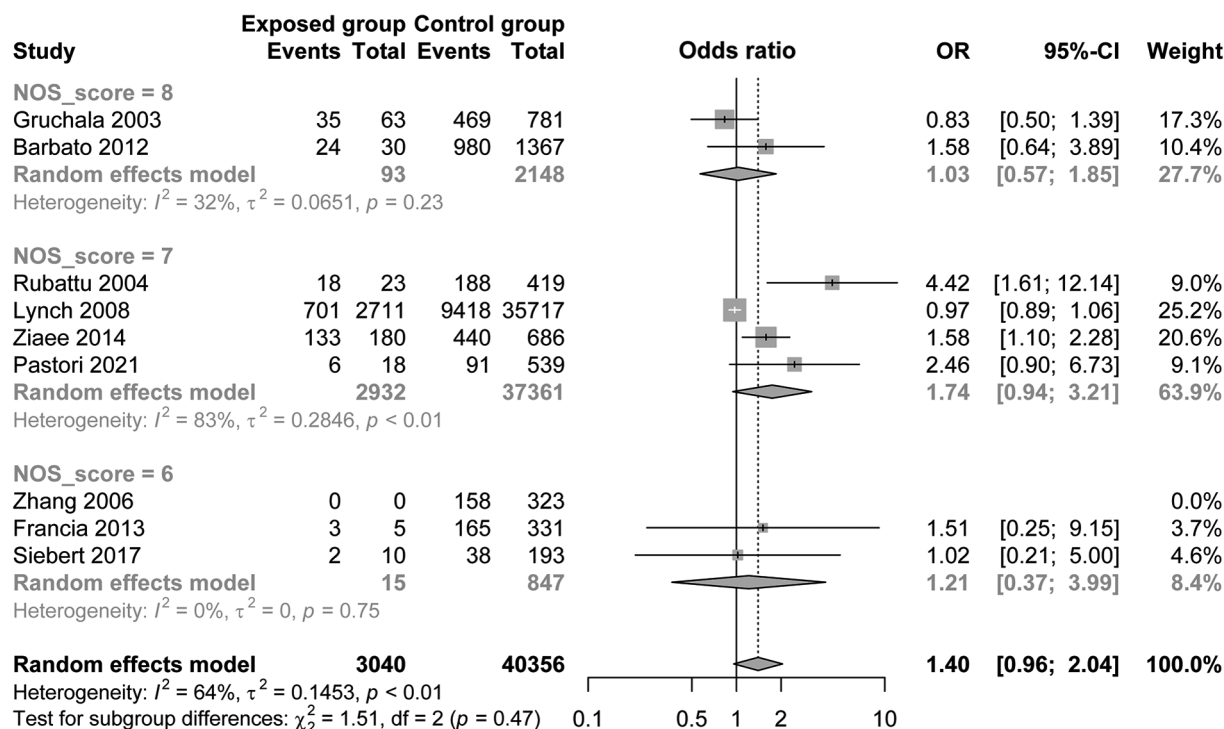

Figure S19. Forest plot for the subgroup analysis for year of publication in the recessive model regarding composite cardio-cerebrovascular event outcome. The squares and horizontal lines correspond to the study-specific OR and 95% CI. The area of the squares reflects the weight (inverse of the variance). The diamond represents the summary OR and 95% CI. OR, odds ratio; df, degrees of freedom.

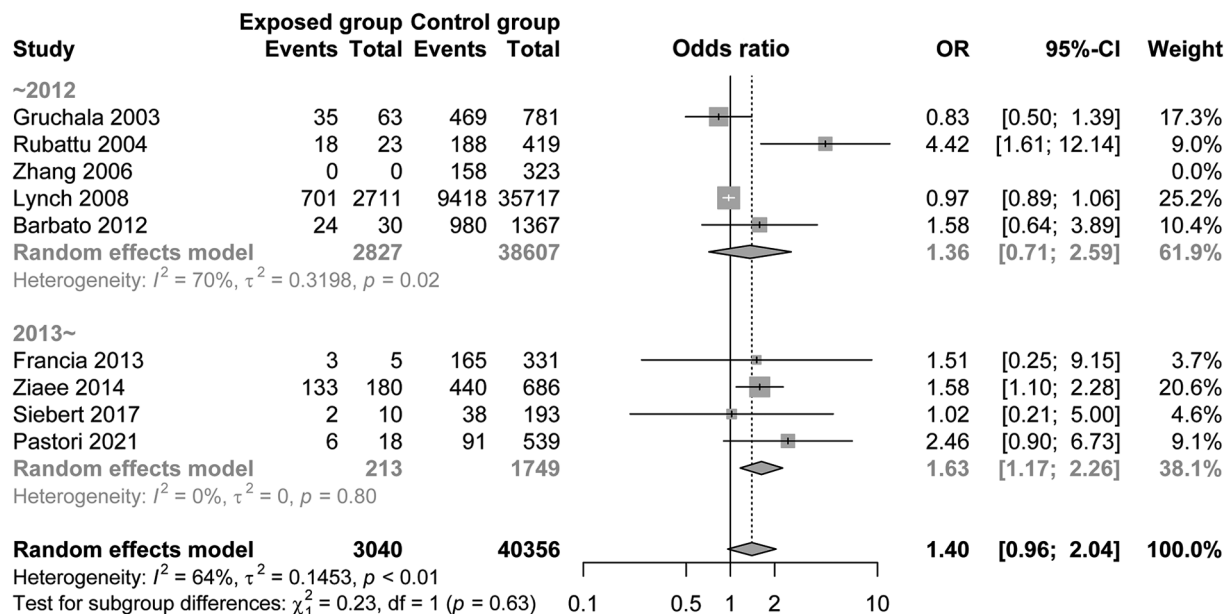

Figure S20. Forest plot for the subgroup analysis for year in the recessive model regarding study region. The squares and horizontal lines correspond to the study-specific OR and 95% CI. The area of the squares reflects the weight (inverse of the variance). The diamond represents the summary OR and 95% CI. OR, odds ratio; df, degrees of freedom.

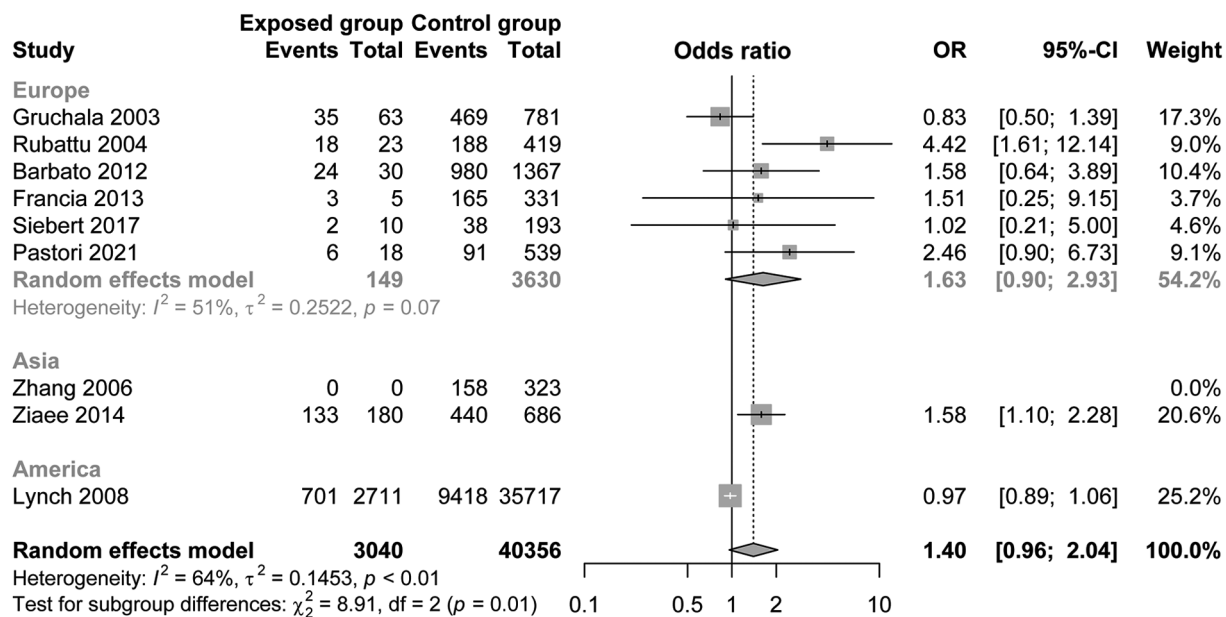

Figure S21. Forest plot for the subgroup analysis for sample size in the recessive model regarding composite cardio-cerebrovascular event outcome. The squares and horizontal lines correspond to the study-specific OR and 95% CI. The area of the squares reflects the weight (inverse of the variance). The diamond represents the summary OR and 95% CI. OR, odds ratio; df, degrees of freedom.

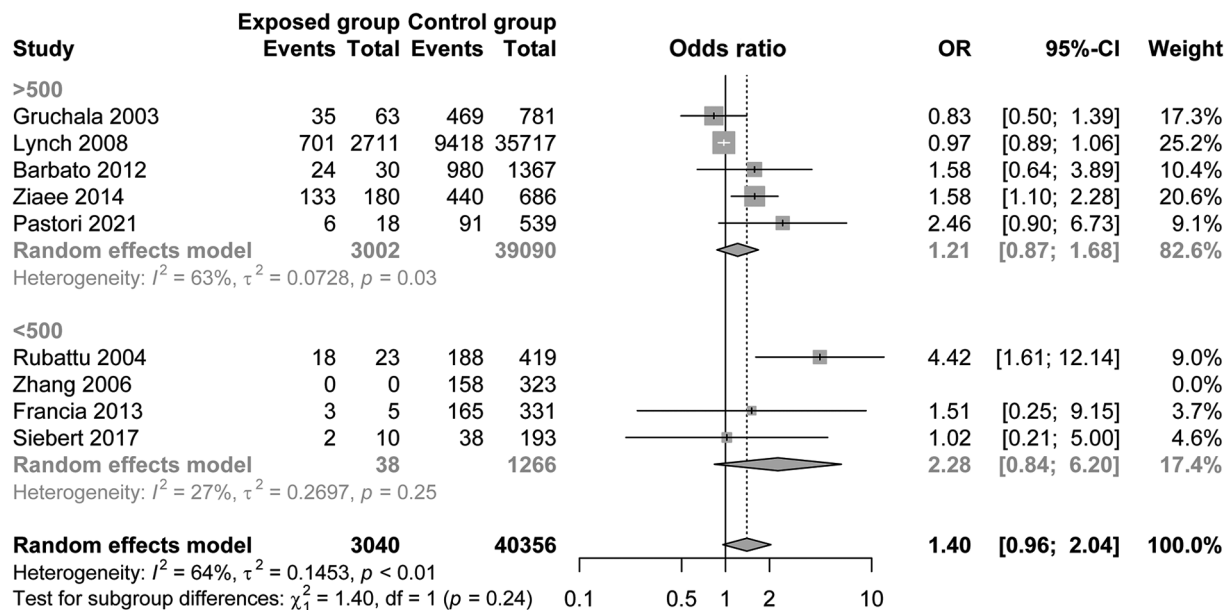

Figure S22. Forest plot for the subgroup analysis for underlying disease in the recessive model regarding composite cardio-cerebrovascular event outcome. The squares and horizontal lines correspond to the study-specific OR and 95% CI. The area of the squares reflects the weight (inverse of the variance). The diamond represents the summary OR and 95% CI. OR, odds ratio; df, degrees of freedom.

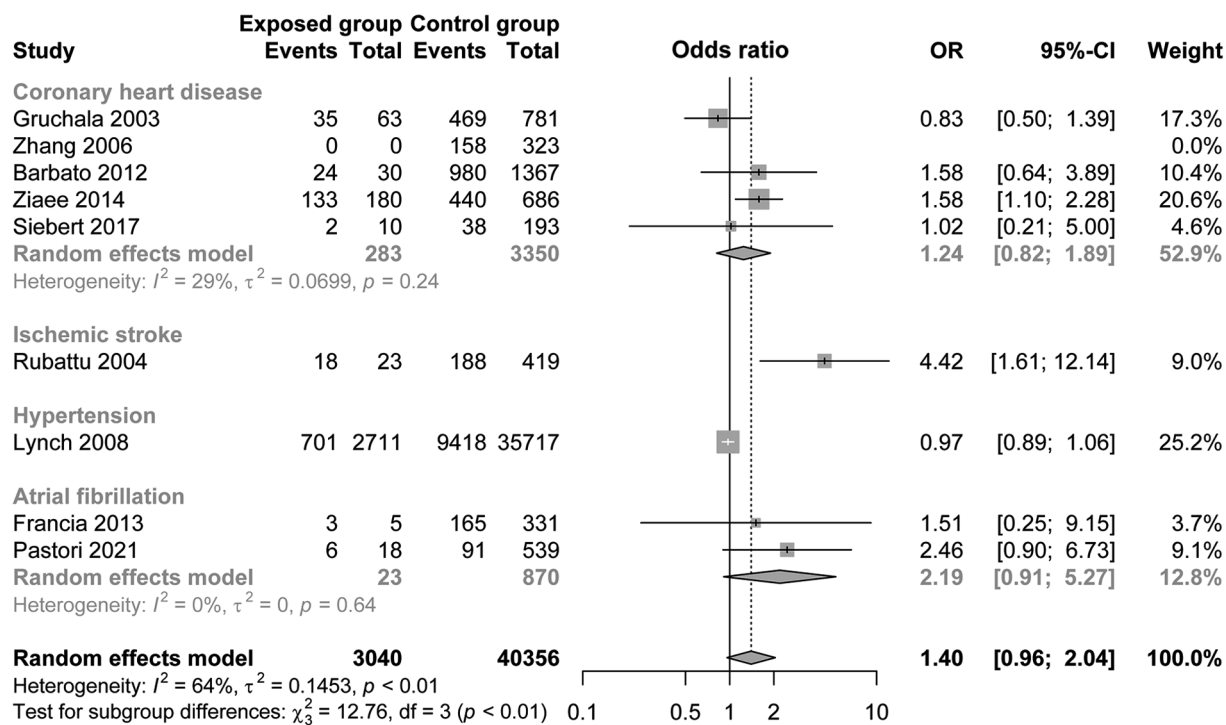

Supplement: Supplementary file 1 [file downloadSupplementary]
